# Supplementary material
Source: PubMed Central journal article supplement (PMC2474721)
Supplement: NIHMS54027-supplement-01.pdf [file NIHMS54027-supplement-01.pdf]

Cell Metabolism, Volume 7

**Supplemental Data**

**Article**

**Dephosphorylation of Translation Initiation**

**Factor 2 $\alpha$  Enhances Glucose Tolerance**

**and Attenuates Hepatosteatosis in Mice**

**Seiichi Oyadomari, Heather P. Harding, Yuhong Zhang, Miho Oyadomari, and David Ron**

**Table S1.**

| Name                                                   | Description                                                                  | Entrez Gene | MEFs        |             |              |               | Liver           |              |                  |             |
|--------------------------------------------------------|------------------------------------------------------------------------------|-------------|-------------|-------------|--------------|---------------|-----------------|--------------|------------------|-------------|
|                                                        |                                                                              |             | Eif2aA/A    |             | Eif2aS/S     |               | Fv2E-PERK (Low) |              | Fv2E-PERK (High) |             |
|                                                        |                                                                              |             | Mock        | AP20187     | Mock         | AP20187       | Mock            | AP20187      | Mock             | AP20187     |
| <b>Translation/amino acid transport and metabolism</b> |                                                                              |             |             |             |              |               |                 |              |                  |             |
| Myd116                                                 | myeloid differentiation primary response gene 116                            | 17872       | 1.05 ± 0.09 | 1.06 ± 0.07 | 1.70 ± 0.28  | 12.97 ± 0.82  | 0.93 ± 0.01     | 1.91 ± 0.32  | 0.33 ± 0.08      | 1.06 ± 0.07 |
| Abcf2                                                  | ATP-binding cassette, sub-family F (GCN20), member 2                         | 27407       | 1.64 ± 0.01 | 1.62 ± 0.23 | 3.97 ± 0.87  | 8.13 ± 1.15   | 0.87 ± 0.02     | 1.67 ± 0.45  | 0.78 ± 0.13      | 0.99 ± 0.15 |
| Asns                                                   | asparagine synthetase                                                        | 27053       | 1.11 ± 0.07 | 0.94 ± 0.02 | 0.86 ± 0.15  | 7.91 ± 1.95   | 0.43 ± 0.11     | 1.81 ± 0.38  | 0.17 ± 0.05      | 1.04 ± 0.14 |
| Mthfr                                                  | 5,10-methylenetetrahydrofolate reductase                                     | 17769       | 1.16 ± 0.02 | 0.91 ± 0.26 | 1.25 ± 0.20  | 7.78 ± 0.38   | 0.44 ± 0.28     | 1.97 ± 0.15  | 0.73 ± 0.10      | 1.08 ± 0.16 |
| Sic1a4                                                 | solute carrier family 1 (glutamate/neutral amino acid transporter), member 4 | 65564       | 0.97 ± 0.02 | 1.03 ± 0.01 | 1.96 ± 0.06  | 6.51 ± 0.69   | 0.93 ± 0.07     | 2.13 ± 0.07  | 0.37 ± 0.09      | 1.62 ± 0.16 |
| Sars                                                   | seryl-aminoacyl-tRNA synthetase                                              | 20226       | 1.37 ± 0.02 | 1.15 ± 0.27 | 2.24 ± 0.84  | 6.13 ± 1.07   | 0.67 ± 0.09     | 1.52 ± 0.09  | 0.53 ± 0.07      | 1.00 ± 0.12 |
| Cars                                                   | cysteinylyl-tRNA synthetase                                                  | 27267       | 1.11 ± 0.11 | 1.02 ± 0.09 | 1.26 ± 0.37  | 6.07 ± 0.89   | 1.25 ± 0.73     | 5.22 ± 0.01  | 0.72 ± 0.11      | 0.90 ± 0.12 |
| Tars                                                   | threonylyl-tRNA synthetase                                                   | 110960      | 1.04 ± 0.20 | 0.97 ± 0.02 | 1.66 ± 0.18  | 4.74 ± 0.57   | 0.89 ± 0.10     | 1.02 ± 0.12  | 1.12 ± 0.03      | 0.98 ± 0.12 |
| Rps5ka2                                                | ribosomal protein S6 kinase, polypeptide 2                                   | 20112       | 0.90 ± 0.14 | 0.74 ± 0.35 | 1.75 ± 0.24  | 4.72 ± 1.01   | 2.07 ± 0.96     | 1.01 ± 0.15  | 1.00 ± 0.32      | 1.03 ± 0.53 |
| Lars                                                   | leucyl-tRNA synthetase                                                       | 107045      | 1.19 ± 0.05 | 1.10 ± 0.02 | 1.26 ± 0.17  | 4.45 ± 0.62   | 0.89 ± 0.01     | 2.13 ± 0.44  | 0.63 ± 0.03      | 1.00 ± 0.03 |
| Eprs                                                   | glutamyl-prolyl-tRNA synthetase                                              | 107508      | 1.08 ± 0.07 | 1.32 ± 0.07 | 1.73 ± 0.34  | 4.39 ± 0.35   | 0.83 ± 0.08     | 1.70 ± 0.08  | 0.47 ± 0.05      | 1.02 ± 0.12 |
| Pycs                                                   | pyrroline-5-carboxylate synthetase                                           | 56454       | 1.05 ± 0.08 | 0.93 ± 0.06 | 1.86 ± 0.59  | 4.32 ± 0.09   | 1.31 ± 0.14     | 1.31 ± 0.30  | 0.64 ± 0.21      | 1.13 ± 0.27 |
| Nars                                                   | asparaginyl-tRNA synthetase                                                  | 70223       | 1.50 ± 0.07 | 1.12 ± 0.18 | 1.76 ± 0.27  | 4.21 ± 0.86   | 1.02 ± 0.04     | 2.23 ± 0.11  | 0.76 ± 0.07      | 0.99 ± 0.13 |
| Wars                                                   | tryptophanyl-tRNA synthetase                                                 | 22375       | 1.05 ± 0.06 | 0.98 ± 0.02 | 2.00 ± 0.26  | 4.06 ± 0.65   | 0.64 ± 0.06     | 1.07 ± 0.08  | 0.71 ± 0.13      | 1.02 ± 0.16 |
| Aars                                                   | alanyl-tRNA synthetase                                                       | 234794      | 1.06 ± 0.06 | 0.86 ± 0.14 | 1.73 ± 0.36  | 4.01 ± 0.32   | 0.77 ± 0.06     | 1.80 ± 0.22  | 0.56 ± 0.05      | 1.04 ± 0.10 |
| Eif4ebp1                                               | eukaryotic translation initiation factor 4E binding protein 1                | 13685       | 1.02 ± 0.01 | 0.86 ± 0.17 | 1.66 ± 0.48  | 3.82 ± 0.56   | 1.05 ± 0.03     | 1.51 ± 0.05  | 0.68 ± 0.10      | 1.08 ± 0.16 |
| Psph                                                   | phosphoserine phosphatase                                                    | 100678      | 1.30 ± 0.12 | 1.12 ± 0.32 | 1.34 ± 0.22  | 3.74 ± 0.37   | 0.89 ± 0.05     | 2.03 ± 0.05  | 0.60 ± 0.03      | 1.00 ± 0.02 |
| Yars                                                   | tyrosyl-tRNA synthetase                                                      | 107271      | 1.11 ± 0.17 | 1.03 ± 0.04 | 1.33 ± 0.56  | 3.59 ± 0.24   | 0.93 ± 0.14     | 1.44 ± 0.23  | 0.53 ± 0.09      | 1.05 ± 0.06 |
| Elp3                                                   | elongation protein 3 homolog (S. cerevisiae)                                 | 74195       | 1.00 ± 0.04 | 1.06 ± 0.03 | 1.45 ± 0.16  | 2.91 ± 0.06   | 0.84 ± 0.06     | 1.10 ± 0.10  | 0.95 ± 0.17      | 0.91 ± 0.13 |
| Iars                                                   | isoleucine-tRNA synthetase                                                   | 105148      | 0.82 ± 0.10 | 0.75 ± 0.10 | 1.23 ± 0.15  | 2.79 ± 0.27   | 0.93 ± 0.17     | 1.91 ± 0.13  | 0.43 ± 0.06      | 1.01 ± 0.05 |
| Sic1a5                                                 | solute carrier family 1 (neutral amino acid transporter), member 5           | 20514       | 1.08 ± 0.24 | 1.17 ± 0.05 | 1.16 ± 0.27  | 2.39 ± 0.20   | 1.01 ± 0.03     | 0.82 ± 0.16  | 0.90 ± 0.13      | 1.53 ± 0.31 |
| Shmt2                                                  | serine hydroxymethyl transferase 2 (mitochondrial)                           | 108037      | 0.78 ± 0.07 | 0.86 ± 0.06 | 1.02 ± 0.01  | 2.34 ± 0.45   | 1.18 ± 0.17     | 1.07 ± 0.04  | 1.30 ± 0.29      | 1.03 ± 0.28 |
| <b>Stress response</b>                                 |                                                                              |             |             |             |              |               |                 |              |                  |             |
| Uvrug                                                  | UV radiation resistance associated gene                                      | 78610       | 4.35 ± 0.05 | 4.08 ± 0.77 | 21.66 ± 5.89 | 49.58 ± 14.94 | 1.16 ± 0.22     | 1.01 ± 0.03  | 0.61 ± 0.05      | 1.32 ± 0.14 |
| Gch1                                                   | GTP cyclohydrolase 1                                                         | 14528       | 0.88 ± 0.16 | 0.63 ± 0.36 | 2.98 ± 1.05  | 21.76 ± 0.80  | 1.16 ± 0.10     | 1.00 ± 0.05  | 1.09 ± 0.06      | 1.04 ± 0.15 |
| GADD45                                                 | growth arrest and DNA-damage-inducible 45 alpha                              | 13197       | 1.11 ± 0.10 | 0.92 ± 0.00 | 2.74 ± 0.06  | 20.24 ± 0.34  | 0.23 ± 0.13     | 3.27 ± 0.26  | 0.02 ± 0.01      | 3.39 ± 0.31 |
| Ndr1                                                   | N-myc downstream regulated-like                                              | 17990       | 1.02 ± 0.24 | 1.05 ± 0.35 | 5.76 ± 1.82  | 14.09 ± 2.25  | 0.90 ± 0.20     | 1.05 ± 0.22  | 1.16 ± 0.19      | 0.89 ± 0.17 |
| Sqs1m1                                                 | sequesosome 1                                                                | 18412       | 1.21 ± 0.04 | 1.26 ± 0.01 | 1.97 ± 0.98  | 6.11 ± 0.59   | 0.62 ± 0.06     | 1.99 ± 0.53  | 0.62 ± 0.05      | 1.02 ± 0.08 |
| Arnt1                                                  | aryl hydrocarbon receptor nuclear translocator-like                          | 11865       | 0.95 ± 0.09 | 0.80 ± 0.23 | 1.18 ± 0.08  | 3.04 ± 0.03   | 0.44 ± 0.24     | 1.26 ± 0.13  | 1.02 ± 0.12      | 1.09 ± 0.14 |
| Dnajb9                                                 | DnaJ (Hsp40) homolog, subfamily B, member 9                                  | 27362       | 0.88 ± 0.19 | 0.78 ± 0.56 | 1.00 ± 0.03  | 2.90 ± 0.02   | 0.72 ± 0.08     | 1.12 ± 0.02  | 0.98 ± 0.12      | 0.84 ± 0.10 |
| Tbce                                                   | tubulin-specific chaperone e                                                 | 70430       | 1.44 ± 0.01 | 0.98 ± 0.31 | 1.25 ± 0.02  | 2.82 ± 0.34   | 0.93 ± 0.03     | 1.26 ± 0.08  | 0.88 ± 0.15      | 0.94 ± 0.11 |
| Cln3                                                   | chloride channel 3                                                           | 12725       | 0.98 ± 0.13 | 0.86 ± 0.03 | 0.77 ± 0.13  | 1.96 ± 0.26   | 0.84 ± 0.25     | 1.38 ± 0.16  | 0.63 ± 0.13      | 1.00 ± 0.15 |
| Dnajc3                                                 | DnaJ (Hsp40) homolog, subfamily C, member 3                                  | 19107       | 0.77 ± 0.24 | 0.76 ± 0.05 | 0.28 ± 0.03  | 1.06 ± 0.18   | 0.91 ± 0.08     | 0.98 ± 0.15  | 0.97 ± 0.14      | 0.95 ± 0.10 |
| <b>Redox/detox</b>                                     |                                                                              |             |             |             |              |               |                 |              |                  |             |
| Pon2                                                   | paraoxonase 2                                                                | 330260      | 2.62 ± 0.31 | 2.18 ± 0.67 | 8.21 ± 0.54  | 17.43 ± 1.80  | 1.17 ± 0.04     | 0.94 ± 0.14  | 1.14 ± 0.41      | 0.92 ± 0.12 |
| B5R1                                                   | NADH-cytochrome B5 reductase                                                 | 72017       | 1.06 ± 0.00 | 0.92 ± 0.40 | 2.80 ± 0.17  | 10.00 ± 1.51  | 0.65 ± 0.06     | 3.05 ± 0.55  | 0.16 ± 0.02      | 1.04 ± 0.13 |
| EST                                                    | RIKEN cDNA 1110049F12 gene                                                   | 66193       | 1.00 ± 0.03 | 1.20 ± 0.51 | 1.33 ± 0.13  | 3.16 ± 0.34   | 1.00 ± 0.01     | 1.00 ± 0.07  | 1.06 ± 0.46      | 0.97 ± 0.41 |
| Txnip                                                  | thioredoxin interacting protein                                              | 56338       | 1.08 ± 0.03 | 0.88 ± 0.31 | 0.88 ± 0.23  | 2.28 ± 0.25   | 0.93 ± 0.13     | 1.07 ± 0.09  | 0.32 ± 0.05      | 1.39 ± 0.40 |
| Cpox                                                   | coproporphyrinogen oxidase                                                   | 12892       | 0.88 ± 0.36 | 0.93 ± 0.18 | 0.78 ± 0.05  | 1.83 ± 0.02   | 0.91 ± 0.22     | 0.93 ± 0.10  | 0.97 ± 0.26      | 1.37 ± 0.24 |
| <b>Protein degradation</b>                             |                                                                              |             |             |             |              |               |                 |              |                  |             |
| Siah2                                                  | seven in absentia 2                                                          | 20439       | 0.88 ± 0.01 | 0.95 ± 0.05 | 1.19 ± 0.08  | 3.45 ± 0.50   | 0.92 ± 0.15     | 1.19 ± 0.10  | 0.57 ± 0.06      | 1.14 ± 0.13 |
| Fbxo8                                                  | F-box only protein 8                                                         | 50753       | 2.38 ± 0.58 | 1.18 ± 0.26 | 0.97 ± 0.45  | 2.92 ± 0.33   | 0.90 ± 0.12     | 1.19 ± 0.37  | 1.06 ± 0.06      | 1.06 ± 0.05 |
| Ctsc                                                   | cathepsin C                                                                  | 13032       | 0.33 ± 0.12 | 0.14 ± 0.09 | 1.06 ± 0.23  | 2.24 ± 0.10   | 1.14 ± 0.06     | 0.97 ± 0.28  | 1.58 ± 0.05      | 0.86 ± 0.19 |
| <b>Secretory pathway</b>                               |                                                                              |             |             |             |              |               |                 |              |                  |             |
| Wfs1                                                   | Wolfram syndrome 1 homolog (human)                                           | 22393       | 1.12 ± 0.23 | 0.99 ± 0.26 | 2.71 ± 0.42  | 7.75 ± 0.51   | 0.54 ± 0.05     | 3.41 ± 0.57  | 0.90 ± 0.16      | 0.90 ± 0.09 |
| Spta5                                                  | spermatogenesis associated 5                                                 | 57815       | 1.00 ± 0.02 | 0.73 ± 0.13 | 2.00 ± 0.28  | 4.74 ± 0.51   | 0.79 ± 0.07     | 2.98 ± 1.06  | 0.40 ± 0.13      | 1.10 ± 0.17 |
| Herpud1                                                | homocysteine-inducible-ubiquitin-like domain 1                               | 64209       | 0.94 ± 0.07 | 0.69 ± 0.17 | 1.07 ± 0.15  | 3.11 ± 0.17   | 0.65 ± 0.22     | 0.96 ± 0.05  | 0.87 ± 0.15      | 1.71 ± 0.13 |
| Ero1l                                                  | ERO1-like (S. cerevisiae)                                                    | 50527       | 0.92 ± 0.10 | 1.07 ± 0.23 | 1.00 ± 0.14  | 2.59 ± 0.33   | 0.91 ± 0.02     | 1.32 ± 0.10  | 0.84 ± 0.05      | 0.95 ± 0.07 |
| Sei1h                                                  | Sei1 (suppressor of lin-12) 1 homolog (C. elegans)                           | 20338       | 1.04 ± 0.01 | 1.03 ± 0.12 | 0.79 ± 0.43  | 2.19 ± 0.73   | 0.87 ± 0.09     | 0.98 ± 0.05  | 1.06 ± 0.05      | 1.04 ± 0.12 |
| ERO1Lb                                                 | ERO1-like beta (S. cerevisiae)                                               | 67475       | 0.77 ± 0.08 | 0.60 ± 0.10 | 0.27 ± 0.04  | 1.09 ± 0.02   | 0.98 ± 0.16     | 0.77 ± 0.05  | 2.02 ± 0.27      | 0.82 ± 0.09 |
| <b>Transcription</b>                                   |                                                                              |             |             |             |              |               |                 |              |                  |             |
| Atf3                                                   | activating transcription factor 3                                            | 11910       | 0.92 ± 0.10 | 0.88 ± 0.08 | 2.54 ± 0.26  | 15.21 ± 1.69  | 0.26 ± 0.07     | 11.05 ± 3.69 | 0.01 ± 0.00      | 1.15 ± 0.12 |
| Mecr                                                   | mitochondrial trans-2-enoyl-CoA reductase                                    | 26922       | 2.41 ± 0.26 | 1.85 ± 0.87 | 4.30 ± 0.56  | 8.75 ± 1.11   | 0.92 ± 0.02     | 0.90 ± 0.19  | 1.10 ± 0.22      | 0.85 ± 0.11 |
| NfkB2                                                  | nuclear factor of kappa B-cells 2, p49/p100                                  | 18034       | 0.99 ± 0.01 | 1.04 ± 0.08 | 3.27 ± 0.23  | 8.26 ± 1.04   | 0.68 ± 0.05     | 1.70 ± 0.48  | 0.47 ± 0.24      | 1.31 ± 0.18 |
| Atf5                                                   | activating transcription factor 5                                            | 107503      | 1.36 ± 0.04 | 1.05 ± 0.13 | 2.22 ± 0.27  | 7.54 ± 2.44   | 0.46 ± 0.01     | 1.98 ± 0.25  | 0.71 ± 0.05      | 1.03 ± 0.15 |
| Chop-10                                                | Leucine zipper transcription factor CHOP, GADD153                            | 13198       | 1.10 ± 0.27 | 0.94 ± 0.19 | 0.98 ± 0.08  | 6.41 ± 0.25   | 0.14 ± 0.05     | 4.31 ± 1.19  | 0.06 ± 0.01      | 1.06 ± 0.22 |
| Nupr1                                                  | nuclear protein 1                                                            | 56312       | 1.26 ± 0.17 | 1.12 ± 0.16 | 1.36 ± 0.23  | 6.29 ± 1.64   | 0.15 ± 0.00     | 26.69 ± 8.14 | 0.02 ± 0.01      | 0.94 ± 0.25 |
| Cebpg                                                  | CCAAT/enhancer binding protein (C/EBP), gamma                                | 12611       | 1.07 ± 0.03 | 0.91 ± 0.07 | 1.94 ± 0.22  | 5.96 ± 0.12   | 0.62 ± 0.08     | 2.01 ± 0.21  | 0.29 ± 0.02      | 1.01 ± 0.06 |
| Relb                                                   | avian reticuloendotheliosis viral (v-rel) oncogene related B                 | 19698       | 0.90 ± 0.07 | 1.18 ± 0.27 | 2.60 ± 0.02  | 5.87 ± 1.42   | 0.84 ± 0.08     | 1.75 ± 0.73  | 0.07 ± 0.02      | 0.99 ± 0.08 |
| Tbp1                                                   | TATA box binding protein-like 1                                              | 237336      | 1.89 ± 0.27 | 1.41 ± 0.53 | 1.79 ± 0.17  | 5.63 ± 0.45   | 0.80 ± 0.04     | 3.06 ± 0.41  | 0.34 ± 0.04      | 1.04 ± 0.30 |
| Cebpb                                                  | CCAAT/enhancer binding protein (C/EBP), beta                                 | 12608       | 1.02 ± 0.03 | 1.10 ± 0.30 | 2.10 ± 0.37  | 4.23 ± 0.68   | 0.84 ± 0.06     | 1.57 ± 0.51  | 0.40 ± 0.07      | 1.31 ± 0.06 |
| Cbx4                                                   | chromobox homolog 4 (Drosophila Pc class)                                    | 12418       | 1.17 ± 0.03 | 1.11 ± 0.10 | 1.48 ± 0.37  | 4.16 ± 0.88   | 0.81 ± 0.07     | 1.24 ± 0.10  | 0.69 ± 0.09      | 4.38 ± 0.16 |
| Snw1                                                   | SNW domain containing 1                                                      | 66354       | 1.16 ± 0.01 | 0.97 ± 0.13 | 1.91 ± 0.60  | 3.87 ± 0.09   | 1.00 ± 0.06     | 1.56 ± 0.15  | 0.58 ± 0.03      | 1.14 ± 0.13 |
| Atf6                                                   | activating transcription factor 6                                            | 226641      | 0.83 ± 0.39 | 1.06 ± 0.14 | 1.32 ± 0.30  | 3.85 ± 0.81   | 0.70 ± 0.17     | 1.11 ± 0.02  | 0.36 ± 0.03      | 1.01 ± 0.08 |
| Atf4                                                   | activating transcription factor 4                                            | 11911       | 0.85 ± 0.08 | 1.04 ± 0.06 | 1.62 ± 0.13  | 3.60 ± 0.61   | 0.84 ± 0.54     | 4.90 ± 0.73  | 0.52 ± 0.11      | 0.79 ± 0.19 |
| Nfil3; E4f                                             | nuclear factor, interleukin 3, regulated                                     | 18030       | 0.87 ± 0.16 | 0.76 ± 0.31 | 1.51 ± 0.13  | 3.56 ± 0.37   | 0.48 ± 0.15     | 1.50 ± 0.03  | 0.24 ± 0.07      | 2.07 ± 0.14 |
| Lmo4                                                   | LIM domain only 4                                                            | 16911       | 1.16 ± 0.32 | 0.98 ± 0.20 | 0.94 ± 0.27  | 3.47 ± 0.15   | 0.83 ± 0.21     | 1.47 ± 0.11  | 0.50 ± 0.11      | 1.84 ± 0.39 |
| Klf4                                                   | Kruppel-like factor 4 (gut)                                                  | 16600       | 0.97 ± 0.01 | 0.77 ± 0.08 | 1.17 ± 0.02  | 2.74 ± 0.02   | 0.72 ± 0.24     | 1.11 ± 0.17  | 0.82 ± 0.13      | 0.98 ± 0.17 |
| Xbp1                                                   | X-box binding protein 1                                                      | 22433       | 1.07 ± 0.06 | 0.74 ± 0.19 | 1.00 ± 0.06  | 2.65 ± 0.29   | 0.73 ± 0.05     | 1.54 ± 0.12  | 0.74 ± 0.11      | 0.99 ± 0.10 |
| Ets2                                                   | E26 avian leukemia oncogene 2, 3' domain                                     | 23872       | 1.00 ± 0.06 | 0.88 ± 0.10 | 1.22 ± 0.38  | 2.41 ± 0.38   | 0.98 ± 0.07     | 2.49 ± 0.70  | 0.21 ± 0.04      | 1.30 ± 0.06 |
| Rxrip110                                               | retinoid X receptor interacting protein 110                                  | 20184       | 1.01 ± 0.01 | 0.89 ± 0.11 | 0.68 ± 0.12  | 1.74 ± 0.49   | 1.00 ± 0.00     | 1.04 ± 0.08  | 1.16 ± 0.23      | 0.94 ± 0.05 |

Expression level of ISR target genes, previously validated in fibroblasts (MEFs) (Lu et al., 2004b), is compared in the liver of un-injected and AP20187-injected (0.2 µg/gm body weight) *Tr::Fv2E-PERK* transgenic expressing low (n = 2) and high (n = 4) relative levels of Fv2E-PERK protein (Figure S2B). The data from untreated and AP20187-treated Fv2E-PERK expressing wildtype (Eif2aS/S) and mutant (Eif2aA/A) fibroblasts has been previously reported (Lu et al., 2004b).

**Table S2.**

| Name       | Description                                                                  | Entrez<br>Gene | Expression level |                | AP induction (fold)   |        |
|------------|------------------------------------------------------------------------------|----------------|------------------|----------------|-----------------------|--------|
|            |                                                                              |                | WT               | <i>Alb::CG</i> | <i>Ttr::Fv2E-PERK</i> |        |
|            |                                                                              |                |                  |                | High                  | Low    |
| GADD45a    | growth arrest and DNA-damage-inducible 45 alpha                              | 13197          | 2.87 ± 0.06      | 1.57 ± 0.34    | 159.34                | 14.55  |
| Atf3       | activating transcription factor 3                                            | 11910          | 1.52 ± 0.26      | 0.90 ± 1.69    | 113.76                | 43.31  |
| Nupr1      | nuclear protein 1                                                            | 56312          | 2.89 ± 0.23      | 0.78 ± 1.64    | 52.11                 | 181.56 |
| Chop-10    | Leucine zipper transcription factor CHOP, GADD153                            | 13198          | 0.97 ± 0.08      | 0.82 ± 0.25    | 17.33                 | 31.20  |
| Relb       | avian reticuloendotheliosis viral (v-rel) oncogene related B                 | 19698          | 1.57 ± 0.02      | 1.27 ± 1.42    | 13.66                 | 2.08   |
| Nfil3; E4B | nuclear factor, interleukin 3, regulated                                     | 18030          | 0.85 ± 0.13      | 0.67 ± 0.37    | 8.59                  | 3.13   |
| B5R.1      | NADH-cytochrome B5 reductase                                                 | 72017          | 0.82 ± 0.17      | 0.89 ± 1.51    | 6.70                  | 4.66   |
| Asns       | asparagine synthetase                                                        | 27053          | 0.67 ± 0.15      | 0.91 ± 1.95    | 6.00                  | 4.18   |
| Slc1a4     | solute carrier family 1 (glutamate/neutral amino acid transporter), member 4 | 55963          | 1.34 ± 0.06      | 0.34 ± 0.69    | 4.42                  | 2.28   |
| Cebpg      | CCAAT/enhancer binding protein (C/EBP), gamma                                | 12611          | 0.93 ± 0.22      | 0.98 ± 0.12    | 3.45                  | 3.22   |
| Myd116     | myeloid differentiation primary response gene 116                            | 17872          | 0.64 ± 0.28      | 0.92 ± 0.82    | 3.22                  | 2.05   |
| Tbpl1      | TATA box binding protein-like 1                                              | 237336         | 0.57 ± 0.17      | 0.76 ± 0.45    | 3.07                  | 3.81   |
| Nfkb2      | nuclear factor of kappa B-cells 2, p49/p100                                  | 18034          | 3.27 ± 0.23      | 1.98 ± 1.04    | 2.78                  | 2.49   |
| Spata5     | spermatogenesis associated 5                                                 | 57815          | 1.24 ± 0.28      | 1.19 ± 0.51    | 2.73                  | 3.77   |
| Iars       | isoleucine-tRNA synthetase                                                   | 105148         | 1.77 ± 0.15      | 0.97 ± 0.27    | 2.37                  | 2.06   |
| Eprs       | glutamyl-prolyl-tRNA synthetase                                              | 107508         | 1.62 ± 0.34      | 1.25 ± 0.35    | 2.15                  | 2.03   |

Expression level in HFD-fed non-transgenic (WT) (n = 2) and *Alb::CG* transgenic (n = 2) mice and fold induction in AP20187-injected *Ttr::Fv2E-PERK* transgenic lines of the subset of genes from table S1 that are induced >2-fold by AP20187 injection in both high and low-expressing *Ttr::Fv2E-PERK* transgenic lines.

**Table S3.**

| Name                                                   | Description                                                                   | MEFs        |                            |              |                            |             |                            | Liver        |                            |             |       | % of <i>Atf4</i> <sup>+/+</sup> |       |       |
|--------------------------------------------------------|-------------------------------------------------------------------------------|-------------|----------------------------|--------------|----------------------------|-------------|----------------------------|--------------|----------------------------|-------------|-------|---------------------------------|-------|-------|
|                                                        |                                                                               | Entrez Gene | <i>Atf4</i> <sup>+/+</sup> |              | <i>Atf4</i> <sup>-/-</sup> |             | <i>Atf4</i> <sup>+/+</sup> |              | <i>Atf4</i> <sup>-/-</sup> |             | MEFs  | Liver                           | MEFs  | Liver |
|                                                        |                                                                               |             | Mock                       | Tunicamycin  | Mock                       | Tunicamycin | Mock                       | AP20187      | Mock                       | AP20187     |       |                                 |       |       |
| <b>Translation/amino acid transport and metabolism</b> |                                                                               |             |                            |              |                            |             |                            |              |                            |             |       |                                 |       |       |
| Myd116                                                 | myeloid differentiation primary response gene 116                             | 17872       | 0.06 ± 0.29                | 6.90 ± 0.13  | 0.59 ± 0.10                | 0.84 ± 0.17 | 0.93 ± 0.01                | 1.91 ± 0.32  | 0.85 ± 0.08                | 1.15 ± 0.10 | 91.4% | 91%                             | 12%   | 60%   |
| Ablc2                                                  | ATP-binding cassette, sub-family F (GCN20), member 2                          | 27407       | 0.09 ± 0.58                | 1.04 ± 0.04  | 0.49 ± 0.34                | 1.01 ± 0.03 | 0.87 ± 0.02                | 1.67 ± 0.45  | 0.59 ± 0.05                | 1.21 ± 0.10 | 53.4% | 68%                             | 98%   | 72%   |
| Asns                                                   | asparagine synthetase                                                         | 27053       | 1.08 ± 0.35                | 2.07 ± 0.05  | 0.32 ± 0.24                | 0.28 ± 0.03 | 0.43 ± 0.11                | 1.81 ± 0.38  | 1.65 ± 0.06                | 0.40 ± 0.01 | 29%   | 381%                            | 14%   | 22%   |
| Mtfr                                                   | 5,10-methylenetetrahydrofolate reductase                                      | 17769       | 0.68 ± 0.26                | 1.51 ± 0.30  | 0.07 ± 0.36                | 0.18 ± 0.03 | 0.44 ± 0.28                | 1.97 ± 0.15  | 0.80 ± 0.26                | 0.50 ± 0.19 | 11%   | 180%                            | 12%   | 25%   |
| Slc14a                                                 | solute carrier family 1 (glutamate/neuronal amino acid transporter), member 4 | 55963       | 0.96 ± 0.15                | 2.23 ± 0.71  | 0.18 ± 0.07                | 0.01 ± 0.00 | 0.93 ± 0.07                | 2.13 ± 0.07  | 0.86 ± 0.11                | 1.03 ± 0.07 | 18%   | 92%                             | 0%    | 48%   |
| Sars                                                   | seryl-aminoacyl-tRNA synthetase                                               | 20226       | 0.20 ± 0.29                | 1.80 ± 0.31  | 0.03 ± 0.05                | 0.03 ± 0.05 | 0.67 ± 0.09                | 1.52 ± 0.09  | 0.38 ± 0.12                | 1.27 ± 0.05 | 14%   | 57%                             | 2%    | 84%   |
| Cars                                                   | cysteinyl-tRNA synthetase                                                     | 27267       | 0.79 ± 0.26                | 1.95 ± 0.10  | 0.01 ± 0.00                | 0.01 ± 0.00 | 1.25 ± 0.73                | 5.22 ± 0.01  | 0.92 ± 0.32                | 0.57 ± 0.01 | 1%    | 73%                             | 1%    | 11%   |
| Tars                                                   | threonyl-tRNA synthetase                                                      | 119960      | 0.80 ± 0.20                | 1.44 ± 0.02  | 0.35 ± 0.05                | 0.45 ± 0.08 | 0.89 ± 0.10                | 1.02 ± 0.12  | 0.88 ± 0.11                | 1.01 ± 0.00 | 44%   | 99%                             | 31%   | 99%   |
| Rps3ka2                                                | ribosomal protein S6 kinase, polypeptide 2                                    | 29112       | 0.67 ± 0.29                | 1.80 ± 0.31  | 0.65 ± 0.05                | 0.53 ± 0.03 | 2.07 ± 0.96                | 1.01 ± 0.15  | 0.77 ± 0.32                | 0.77 ± 0.10 | 97%   | 37%                             | 30%   | 76%   |
| Lars                                                   | leucyl-tRNA synthetase                                                        | 107045      | 0.96 ± 0.14                | 1.89 ± 0.12  | 0.52 ± 0.02                | 0.60 ± 0.03 | 0.89 ± 0.01                | 2.13 ± 0.44  | 1.00 ± 0.00                | 0.94 ± 0.11 | 54%   | 112%                            | 32%   | 44%   |
| Eprs                                                   | glutamyl-prolyl-tRNA synthetase                                               | 107508      | 0.99 ± 0.20                | 1.71 ± 0.27  | 0.48 ± 0.04                | 0.61 ± 0.00 | 0.83 ± 0.08                | 1.70 ± 0.08  | 0.57 ± 0.03                | 1.17 ± 0.10 | 48%   | 68%                             | 35%   | 69%   |
| Pycs                                                   | pyrroline-5-carboxylate synthetase                                            | 56454       | 0.76 ± 0.18                | 2.08 ± 0.14  | 0.17 ± 0.14                | 0.15 ± 0.04 | 1.31 ± 0.14                | 1.31 ± 0.30  | 0.33 ± 0.08                | 0.79 ± 0.16 | 22%   | 25%                             | 7%    | 60%   |
| Nars                                                   | asparaginyl-tRNA synthetase                                                   | 70223       | 0.95 ± 0.27                | 1.64 ± 0.22  | 0.37 ± 0.15                | 0.43 ± 0.04 | 1.02 ± 0.04                | 2.23 ± 0.11  | 0.69 ± 0.06                | 0.85 ± 0.14 | 39%   | 67%                             | 26%   | 38%   |
| Wars                                                   | tryptophanyl-tRNA synthetase                                                  | 22375       | 0.73 ± 0.59                | 3.06 ± 0.30  | 0.27 ± 0.00                | 0.25 ± 0.03 | 0.64 ± 0.06                | 1.07 ± 0.08  | 0.88 ± 0.12                | 1.05 ± 0.01 | 37%   | 136%                            | 8%    | 99%   |
| Aars                                                   | alanyl-tRNA synthetase                                                        | 234734      | 0.67 ± 0.05                | 1.52 ± 0.06  | 0.35 ± 0.06                | 0.40 ± 0.02 | 0.77 ± 0.06                | 1.80 ± 0.22  | 0.74 ± 0.05                | 1.36 ± 0.19 | 53%   | 96%                             | 27%   | 76%   |
| Ei4ebp1                                                | eukaryotic translation initiation factor 4E binding protein 1                 | 13685       | 0.77 ± 0.14                | 1.55 ± 0.19  | 0.44 ± 0.02                | 0.40 ± 0.03 | 1.05 ± 0.03                | 1.51 ± 0.05  | 0.88 ± 0.09                | 0.80 ± 0.04 | 57%   | 85%                             | 26%   | 53%   |
| Paph                                                   | phosphoserine phosphatase                                                     | 100678      | 0.87 ± 0.17                | 1.57 ± 0.04  | 0.61 ± 0.05                | 0.61 ± 0.05 | 0.89 ± 0.05                | 2.03 ± 0.05  | 1.07 ± 0.02                | 0.87 ± 0.06 | 70%   | 120%                            | 39%   | 43%   |
| Yars                                                   | tyrosyl-tRNA synthetase                                                       | 107271      | 0.96 ± 0.06                | 1.59 ± 0.15  | 0.71 ± 0.52                | 0.79 ± 0.24 | 0.93 ± 0.14                | 1.44 ± 0.23  | 0.82 ± 0.04                | 1.03 ± 0.12 | 74%   | 86%                             | 50%   | 71%   |
| Elp3                                                   | elongation protein 3 homolog (S. cerevisiae)                                  | 74195       | 0.26 ± 0.11                | 1.04 ± 0.03  | 0.40 ± 0.02                | 0.54 ± 0.05 | 0.84 ± 0.06                | 1.10 ± 0.10  | 0.93 ± 0.07                | 1.10 ± 0.03 | 152%  | 11%                             | 51%   | 100%  |
| Iars                                                   | isoleucine-tRNA synthetase                                                    | 105148      | 0.78 ± 0.11                | 1.23 ± 0.07  | 0.46 ± 0.32                | 0.33 ± 0.04 | 0.93 ± 0.17                | 1.91 ± 0.13  | 0.78 ± 0.10                | 1.00 ± 0.03 | 59%   | 84%                             | 27%   | 52%   |
| Slc1a5                                                 | solute carrier family 1 (neural amino acid transporter), member 5             | 20514       | 0.72 ± 0.36                | 1.45 ± 0.00  | 0.12 ± 0.04                | 0.49 ± 0.21 | 1.01 ± 0.03                | 0.82 ± 0.16  | 1.28 ± 0.06                | 0.77 ± 0.08 | 16%   | 126%                            | 34%   | 94%   |
| Shm2                                                   | serine hydroxymethyl transferase 2 (mitochondrial)                            | 108037      | 0.67 ± 0.34                | 1.67 ± 0.48  | 0.77 ± 0.05                | 0.96 ± 0.01 | 1.18 ± 0.17                | 1.07 ± 0.04  | 0.96 ± 0.02                | 0.89 ± 0.10 | 110%  | 82%                             | 58%   | 83%   |
| <b>Stress response</b>                                 |                                                                               |             |                            |              |                            |             |                            |              |                            |             |       |                                 |       |       |
| Uvrag                                                  | UV radiation resistance associated gene                                       | 78610       | 0.01 ± 0.00                | 0.07 ± 0.37  | 0.17 ± 2.03                | 1.80 ± 1.31 | 1.16 ± 0.22                | 1.01 ± 0.03  | 0.80 ± 0.22                | 0.81 ± 0.17 | 1695% | 69%                             | 2450% | 80%   |
| Gch1                                                   | GTP cyclohydrolase 1                                                          | 14528       | 0.62 ± 0.06                | 3.24 ± 0.91  | 0.40 ± 0.05                | 0.58 ± 0.22 | 1.16 ± 0.10                | 1.00 ± 0.05  | 0.72 ± 0.13                | 1.09 ± 0.13 | 65%   | 62%                             | 18%   | 10%   |
| GADD45a                                                | growth arrest and DNA-damage-inducible 45 alpha                               | 13197       | 0.65 ± 0.55                | 10.25 ± 1.16 | 0.01 ± 0.00                | 0.47 ± 0.42 | 0.23 ± 0.13                | 3.27 ± 0.26  | 0.22 ± 0.09                | 1.56 ± 0.11 | 2%    | 98%                             | 5%    | 48%   |
| Ndr1                                                   | Nr1myc downstream regulated-like                                              | 17990       | 0.67 ± 0.11                | 2.94 ± 0.55  | 0.74 ± 0.02                | 0.64 ± 0.09 | 0.90 ± 0.20                | 1.05 ± 0.22  | 0.80 ± 0.06                | 1.21 ± 0.07 | 110%  | 89%                             | 22%   | 115%  |
| Sqs1m1                                                 | sequestosome 1                                                                | 18412       | 0.56 ± 0.17                | 1.74 ± 0.08  | 0.65 ± 0.10                | 0.85 ± 0.16 | 0.62 ± 0.06                | 0.99 ± 0.58  | 0.57 ± 0.07                | 1.36 ± 0.05 | 116%  | 93%                             | 49%   | 68%   |
| Arl1                                                   | aryl hydrocarbon receptor nuclear translocator-like                           | 11865       | 0.35 ± 0.03                | 1.10 ± 0.10  | 0.75 ± 0.03                | 1.12 ± 0.24 | 0.44 ± 0.24                | 1.26 ± 0.13  | 0.89 ± 0.13                | 1.15 ± 0.19 | 212%  | 203%                            | 101%  | 91%   |
| Dnajb9                                                 | Dnaj (Hsp40) homolog, subfamily B, member 9                                   | 27362       | 0.69 ± 0.26                | 3.74 ± 0.28  | 0.42 ± 0.12                | 2.96 ± 0.38 | 0.72 ± 0.08                | 1.12 ± 0.02  | 0.69 ± 0.16                | 1.47 ± 0.06 | 61%   | 95%                             | 79%   | 131%  |
| Tbce                                                   | tubulin-specific chaperone e                                                  | 70430       | 0.70 ± 0.13                | 1.08 ± 0.06  | 0.51 ± 0.11                | 0.87 ± 0.21 | 0.93 ± 0.03                | 1.26 ± 0.08  | 0.76 ± 0.11                | 1.23 ± 0.20 | 72%   | 82%                             | 61%   | 97%   |
| Ctsc3                                                  | chloride channel 3                                                            | 12725       | 0.09 ± 0.57                | 1.69 ± 0.06  | 0.66 ± 0.17                | 0.68 ± 0.12 | 0.84 ± 0.25                | 1.38 ± 0.16  | 0.83 ± 0.19                | 0.84 ± 0.06 | 729%  | 99%                             | 41%   | 68%   |
| Dnajc3                                                 | Dnaj (Hsp40) homolog, subfamily C, member 3                                   | 19107       | 1.24 ± 0.27                | 6.05 ± 1.69  | 0.75 ± 0.07                | 4.31 ± 0.66 | 0.91 ± 0.08                | 0.98 ± 0.15  | 0.84 ± 0.18                | 1.24 ± 0.14 | 61%   | 92%                             | 96%   | 127%  |
| <b>Redox/detox</b>                                     |                                                                               |             |                            |              |                            |             |                            |              |                            |             |       |                                 |       |       |
| Pon2                                                   | paraoxonase 2                                                                 | 330260      | 0.09 ± 0.52                | 0.09 ± 0.55  | 0.06 ± 0.26                | 0.01 ± 0.00 | 1.17 ± 0.04                | 0.94 ± 0.14  | 1.00 ± 0.00                | 0.86 ± 0.08 | 71%   | 85%                             | 11%   | 92%   |
| B5R1                                                   | NAD(P)+ dependent B5 reductase                                                | 23217       | 0.98 ± 0.27                | 3.15 ± 0.33  | 0.41 ± 0.11                | 0.55 ± 0.08 | 0.65 ± 0.06                | 1.45 ± 0.37  | 0.65 ± 0.15                | 1.45 ± 0.37 | 42%   | 17%                             | 47%   | 47%   |
| EST                                                    | RIKEN cDNA 1110049F12 gene                                                    | 66193       | 0.37 ± 0.07                | 0.75 ± 0.35  | 0.66 ± 0.25                | 1.19 ± 0.03 | 1.00 ± 0.01                | 1.00 ± 0.07  | 0.92 ± 0.25                | 1.12 ± 0.22 | 181%  | 92%                             | 157%  | 113%  |
| Txnip                                                  | thioredoxin interacting protein                                               | 56338       | 0.64 ± 0.43                | 1.43 ± 0.26  | 0.54 ± 0.28                | 1.52 ± 0.93 | 0.93 ± 0.13                | 1.07 ± 0.09  | 1.13 ± 0.11                | 0.78 ± 0.12 | 86%   | 121%                            | 106%  | 73%   |
| Cpxc                                                   | coproporphyrin oxidase                                                        | 12892       | 0.95 ± 0.44                | 3.31 ± 0.34  | 0.58 ± 0.18                | 1.01 ± 0.17 | 0.91 ± 0.22                | 0.93 ± 0.10  | 0.92 ± 0.04                | 1.19 ± 0.13 | 61%   | 101%                            | 31%   | 128%  |
| <b>Protein degradation</b>                             |                                                                               |             |                            |              |                            |             |                            |              |                            |             |       |                                 |       |       |
| Siat2                                                  | seven in absentia 2                                                           | 20439       | 0.80 ± 0.02                | 2.63 ± 0.33  | 0.25 ± 0.07                | 0.96 ± 0.10 | 0.92 ± 0.15                | 1.19 ± 0.10  | 0.87 ± 0.09                | 0.95 ± 0.07 | 31%   | 95%                             | 36%   | 80%   |
| Fbxo8                                                  | F-box only protein 8                                                          | 50753       | 0.69 ± 0.34                | 1.17 ± 0.22  | 0.40 ± 0.01                | 0.65 ± 0.02 | 0.90 ± 0.12                | 1.19 ± 0.37  | 0.87 ± 0.08                | 1.31 ± 0.12 | 58%   | 97%                             | 55%   | 111%  |
| Ctsc                                                   | cathepsin C                                                                   | 13032       | 0.53 ± 1.15                | 0.84 ± 0.92  | 1.06 ± 1.03                | 0.52 ± 0.64 | 1.14 ± 0.06                | 0.97 ± 0.28  | 1.08 ± 0.18                | 0.88 ± 0.04 | 200%  | 94%                             | 62%   | 91%   |
| <b>Secretory pathway</b>                               |                                                                               |             |                            |              |                            |             |                            |              |                            |             |       |                                 |       |       |
| Wfs1                                                   | Wolfram syndrome 1 homolog (human)                                            | 22393       | 0.06 ± 0.27                | 5.64 ± 0.09  | 0.02 ± 0.02                | 0.99 ± 0.20 | 0.54 ± 0.05                | 3.41 ± 0.57  | 0.42 ± 0.08                | 1.47 ± 0.06 | 30%   | 78%                             | 18%   | 43%   |
| Spata5                                                 | spermatogenesis associated 5                                                  | 57815       | 0.27 ± 0.16                | 0.90 ± 0.32  | 0.56 ± 0.33                | 1.84 ± 0.27 | 0.79 ± 0.07                | 2.98 ± 1.06  | 0.41 ± 0.15                | 1.32 ± 0.18 | 207%  | 52%                             | 206%  | 44%   |
| Herpud1                                                | homocysteine-inducible-ubiquitin-like domain 1                                | 64209       | 0.38 ± 0.33                | 3.84 ± 0.33  | 0.06 ± 0.07                | 1.05 ± 0.02 | 0.65 ± 0.22                | 0.96 ± 0.05  | 0.75 ± 0.28                | 1.21 ± 0.10 | 15%   | 116%                            | 27%   | 126%  |
| Ero1l                                                  | ERO1-like (S. cerevisiae)                                                     | 50527       | 0.52 ± 0.47                | 2.03 ± 0.02  | 0.59 ± 0.14                | 0.70 ± 0.02 | 0.91 ± 0.02                | 1.32 ± 0.10  | 1.07 ± 0.03                | 0.89 ± 0.07 | 114%  | 117%                            | 34%   | 67%   |
| Seh1                                                   | Seh1 (suppressor of lin-12) 1 homolog (C. elegans)                            | 20338       | 0.77 ± 0.56                | 5.96 ± 4.70  | 0.36 ± 0.36                | 2.83 ± 2.07 | 0.87 ± 0.09                | 0.98 ± 0.05  | 0.91 ± 0.24                | 1.12 ± 0.04 | 47%   | 105%                            | 47%   | 114%  |
| EROLB                                                  | ERO1-like beta (S. cerevisiae)                                                | 67475       | 0.68 ± 0.26                | 4.02 ± 0.57  | 0.73 ± 0.08                | 2.76 ± 0.09 | 0.98 ± 0.16                | 0.77 ± 0.05  | 1.10 ± 0.28                | 1.35 ± 0.15 | 82%   | 112%                            | 69%   | 175%  |
| <b>Transcription</b>                                   |                                                                               |             |                            |              |                            |             |                            |              |                            |             |       |                                 |       |       |
| Atf3                                                   | activating transcription factor 3                                             | 11910       | 0.73 ± 0.08                | 3.35 ± 0.57  | 0.61 ± 0.02                | 0.91 ± 0.06 | 0.26 ± 0.07                | 11.05 ± 3.69 | 0.22 ± 0.04                | 2.23 ± 0.58 | 84%   | 88%                             | 27%   | 20%   |
| Mecr                                                   | mitochondrial trans-2-enoyl-CoA reductase                                     | 26922       | 0.03 ± 0.06                | 1.68 ± 1.71  | 0.01 ± 0.00                | 0.69 ± 0.79 | 0.92 ± 0.02                | 0.90 ± 0.19  | 1.06 ± 0.11                | 1.07 ± 0.02 | 32%   | 115%                            | 41%   | 118%  |
| Nfk2b                                                  | nuclear factor of kappa B-cells 2, p49/p100                                   | 18034       | 0.38 ± 0.09                | 0.80 ± 0     | 0.52 ± 0.00                | 1.27 ± 0.13 | 0.68 ± 0.05                | 1.70 ± 0.48  | 0.72 ± 0.14                | 1.27 ± 0.17 | 139%  | 106%                            | 158%  | 75%   |
| Atf5                                                   | activating transcription factor 5                                             | 107503      | 0.89 ± 0.21                | 2.80 ± 0.56  | 0.13 ± 0.09                | 0.16 ± 0.03 | 0.46 ± 0.01                | 1.98 ± 0.25  | 0.23 ± 0.12                | 1.90 ± 0.37 | 13%   | 49%                             | 8%    | 98%   |
| Chop-10                                                | Leucine zipper transcription factor CHOP, GADD153                             | 13198       | 0.60 ± 0.34                | 11.30 ± 0.07 | 0.36 ± 0.10                | 3.72 ± 0.18 | 0.14 ± 0.05                | 4.31 ± 1.19  | 0.18 ± 0.07                | 2.07 ± 0.37 | 60%   | 131%                            | 33%   | 4%    |
| Nupr1                                                  | nuclear protein 1                                                             | 56312       | 1.22 ± 0.75                | 3.37 ± 0.39  | 0.04 ± 0.05                | 0.04 ± 0.09 | 0.15 ± 0.00                | 26.69 ± 8.14 | 0.84 ± 0.39                | 1.04 ± 0.61 | 3%    | 569%                            | 1%    | 4%    |
| Cebpb                                                  | CCAAT/enhancer binding protein (C/EBP), gamma                                 | 12611       | 0.89 ± 0.25                | 1.75 ± 0.09  | 0.58 ± 0.04                | 0.80 ± 0.15 | 0.62 ± 0.08                | 2.01 ± 0.21  | 0.64 ± 0.19                | 1.23 ± 0.13 | 65%   | 102%                            | 46%   | 61%   |
| Rarb                                                   | avian reticuloendotheliosis viral (v-rel) oncogene related B                  | 19699       | 0.56 ± 0.21                | 1.00 ± 0.41  | 0.28 ± 0.11                | 1.60 ± 0.57 | 0.84 ± 0.08                | 1.75 ± 0.73  | 0.77 ± 0.17                | 1.30 ± 0.01 | 49%   | 91%                             | 159%  | 75%   |
| Tdp1                                                   | TATA box binding protein-like 1                                               | 237336      | 0.55 ± 0.47                | 1.08 ± 0.08  | 0.67 ± 0.23                | 0.91 ± 0.23 | 0.80 ± 0.04                | 3.06 ± 0.41  | 0.83 ± 0.05                | 1.43 ± 0.32 | 122%  | 103%                            | 85%   | 47%   |
| Cebpb                                                  | CCAAT/enhancer binding protein (C/EBP), beta                                  | 12608       | 0.98 ± 0.30                | 1.96 ± 0.05  | 0.30 ± 0.08                | 0.27 ± 0.07 | 0.84 ± 0.06                | 1.67 ± 0.51  | 0.76 ± 0.15                | 1.61 ± 0.04 | 30%   | 91%                             | 14%   | 97%   |
| Cbx4                                                   | chromobox homolog 4 (Drosophila Pc class)                                     | 12418       | 0.91 ± 0.10                | 1.98 ± 0.41  | 0.71 ± 0.00                | 0.97 ± 0.07 | 0.81 ± 0.07                | 1.24 ± 0.10  | 0.54 ± 0.18                | 1.14 ± 0.02 | 78%   | 67%                             | 49%   | 92%   |
| Snw1                                                   | SNW domain containing 1                                                       | 66354       | 0.55 ± 0.22                | 1.15 ± 0.20  | 0.98 ± 0.00                | 1.29 ± 0.96 | 1.00 ± 0.06                | 1.56 ± 0.15  | 0.80 ± 0.20                | 0.77 ± 0.13 | 179%  | 80%                             | 112%  | 50%   |
| Atf6                                                   | activating transcription factor 6                                             | 226641      |                            |              |                            |             |                            |              |                            |             |       |                                 |       |       |

**Table S4. Sequence of Primers Used in Quantitative RT-PCR Analysis**

| Name    | Description                                      | Entrez Gene | Forward primer                  | Reverse primer                  |
|---------|--------------------------------------------------|-------------|---------------------------------|---------------------------------|
| Acaca   | acetyl-CoA carboxylase alpha                     | 125656172   | 5' -GCCATTGGTATTGGGGCTTAC-3'    | 5' -CCCACCAAGGACTTTGTTG-3'      |
| Acacb   | acetyl-CoA carboxylase beta                      | 48976024    | 5' -GGAGGCAACAGGGTCATAGA-3'     | 5' -TGATCGGCCATCTTGATGTA-3'     |
| Atf3    | activating transcription factor 3                | 31542153    | 5' -CCAGGTCTCTGCCTCAGAAG-3'     | 5' -CATCTCCAGGGTCTGTTGT-3'      |
| Actb    | $\beta$ actin                                    | 145966868   | 5' -CCGCCCTAGGCACCAGGGTG-3'     | 5' -GGCTGGGGTGTGAAGTCTCAAA-3'   |
| Hspa5   | BiP, GRP78                                       | 31981721    | 5' -GAAAGGATGGTTAATGATGCTGAG-3' | 5' -GTCTTCAATGTCCGCATCCTG-3'    |
| Cebpa   | CCAAT/enhancer binding protein (C/EBP), alpha    | 131886531   | 5' -CAAGAACAGCAACGAGTACCG-3'    | 5' -GTCACTGGTCAACTCCAGCAC-3'    |
| Cebpb   | CCAAT/enhancer binding protein (C/EBP), beta     | 145301630   | 5' -CAAGCTGAGCGACGAGTACA-3'     | 5' -CAGCTGCTCCACCTTCTTCT-3'     |
| Chop-10 | C/EBP homologous protein                         | 50406       | 5' -CATAACCACCACACCTGAAAG-3'    | 5' -CCGTTTCTAGTTCTTCCTTGC-3'    |
| Fasn    | fatty acid synthase                              | 93102408    | 5' -AAGTTGCCCGAGTCAGAGAA-3'     | 5' -TGAGGCTGGGTGATACCTC-3'      |
| Gck     | glucokinase                                      | 118129970   | 5' -TCTCTGACTTCCTGGACAAGC-3'    | 5' -CGTGTCAATCACCATTGCC-3'      |
| Pck1    | phosphoenolpyruvate carboxykinase                | 118130217   | 5' -AGTGCTGTGGGAAGACTAACTTGG-3' | 5' -GATTGTCTTCACTGAGGTGCCAGG-3' |
| Pparg   | peroxisome proliferator-activated receptor gamma | 142367023   | 5' -ACATAAAGTCCTTCCCGTGACCA-3'  | 5' -AAATTCGGATGGCCACCTCTTTC-3'  |
| Scd1    | stearoyl-CoA desaturase                          | 118130513   | 5' -TGGGTTGGCTGCTTTGTG-3'       | 5' -GCGTGGGCAGGATGAAG-3'        |
| Xbp1    | X box-binding protein 1                          | 13775155    | 5' -AAACAGAGTAGCAGCGCAGACTGC-3' | 5' -TCCTTCTGGGTAGACCTCTGGGA-3'  |

**Table S5.**

| Name   | 8 hr AP20187 (mg/kg) |                   |                    |                   |                    |
|--------|----------------------|-------------------|--------------------|-------------------|--------------------|
|        | 0                    | 0.002             | 0.02               | 0.2               | 2                  |
| SCD1   | 47.62 $\pm$ 0.48     | 80.95 $\pm$ 80.95 | 100.00 $\pm$ 9.05  | 52.38 $\pm$ 4.76  | 19.05 $\pm$ 9.05   |
| ACACa  | 52.63 $\pm$ 0.26     | 78.95 $\pm$ 10.00 | 100.00 $\pm$ 8.42  | 65.79 $\pm$ 8.42  | 31.58 $\pm$ 6.32   |
| ACACb  | 40.98 $\pm$ 0.82     | 77.46 $\pm$ 13.93 | 100.00 $\pm$ 7.79  | 53.28 $\pm$ 7.38  | 32.79 $\pm$ 4.10   |
| FASN   | 47.62 $\pm$ 0.48     | 71.43 $\pm$ 11.90 | 100.00 $\pm$ 14.76 | 61.90 $\pm$ 10.00 | 19.05 $\pm$ 2.38   |
| PEPCK  | 55.56 $\pm$ 0.56     | 83.33 $\pm$ 16.67 | 100.00 $\pm$ 22.22 | 38.89 $\pm$ 3.89  | 33.33 $\pm$ 14.44  |
| PPARg  | 10.42 $\pm$ 0.09     | 36.46 $\pm$ 4.17  | 100.00 $\pm$ 8.33  | 32.29 $\pm$ 3.23  | 12.50 $\pm$ 1.67   |
| C/EBPb | 38.31 $\pm$ 1.954    | 49.04 $\pm$ 3.372 | 53.64 $\pm$ 4.598  | 75.48 $\pm$ 4.138 | 100.00 $\pm$ 8.046 |
| CHOP   | 2.27 $\pm$ 0.01      | 4.77 $\pm$ 0.23   | 12.27 $\pm$ 0.93   | 63.64 $\pm$ 3.18  | 100.00 $\pm$ 13.50 |
| ATF3   | 0.92 $\pm$ 0.00      | 1.65 $\pm$ 0.09   | 3.67 $\pm$ 0.47    | 59.63 $\pm$ 5.45  | 100.00 $\pm$ 16.66 |

Relative expression levels of ISR target genes in the liver of AP20187-injected mice expressing Fv2E-PERK at low level (data used in Figure 6A). Expression level of each gene was determined by real-time PCR. For plotting purpose and the peak level of expression was adjusted to 100%

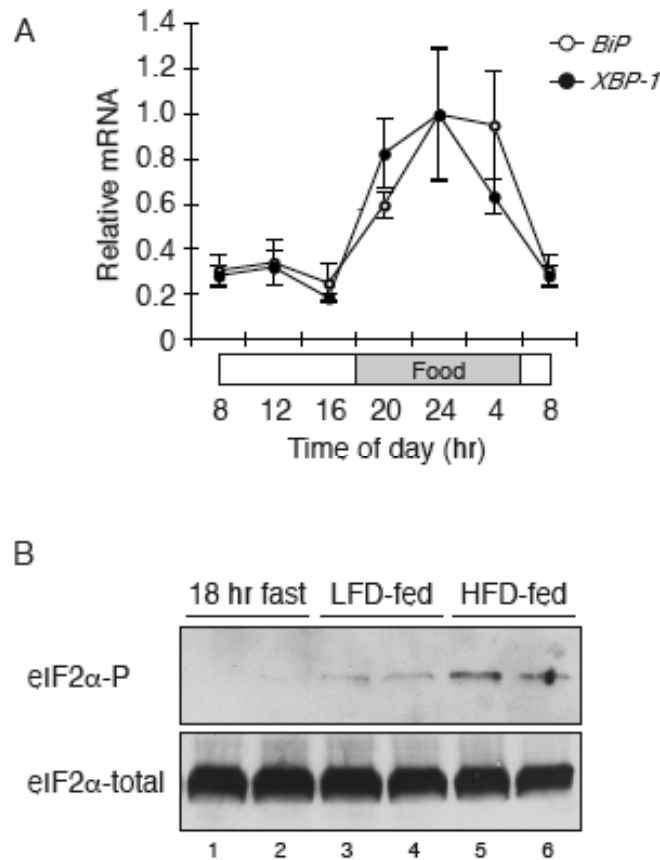

### Figure S1. Nutrient Intake Activates the ISR

(A) Relative levels of BiP and XBP-1 mRNA in livers of wild-type mice procured at different times in the day (mean  $\pm$  SEM, n = 3). One-way ANOVA: p = 0.013 in BiP and p = 0.004 in XBP-1. For the preceding week the mice had been maintained on a regimen whereby standard lab chow (low-fat diet) was provided from 18:00 to 06:00 hours and removed from the cage from 06:00 to 18:00 hours (as indicated). The same regimen was used on the day of the study and liver mRNA sampled at the time points indicated.

(B) Immunoblot of phosphorylated eIF2 $\alpha$  and total eIF2 $\alpha$  in extract of livers of individual animals previously maintained on standard lab chow (LFD) following an 18 hour fast or 4 hours after re-feeding standard low fat content (LFD) or high fat content (HFD) chow.
